# Supplementary material
Source: ML conference proceedings conference paper supplement (https://openreview.net/forum?id=MYfyMjaoQh)
Supplement: supplementary_material [file SI Petimot.pdf › SI Petimot.pdf]

# Supporting Information for PETIMOT: A Novel Framework for Inferring Protein Motions from Sparse Data Using SE(3)-Equivariant Graph Neural Networks

## A Statistical significance of method performance comparisons

| Metrics              | AlphaFlow       | ESMFlow         | NMA             |
|----------------------|-----------------|-----------------|-----------------|
| Min. LS Error        | <b>2.24e-22</b> | <b>1.02e-33</b> | <b>6.45e-43</b> |
| Min. Magnitude Error | <b>4.83e-13</b> | <b>1.55e-24</b> | <b>7.44e-37</b> |
| OLA LS Error         | <b>9.15e-26</b> | <b>6.59e-40</b> | <b>7.62e-44</b> |
| OLA Magnitude Error  | <b>1.93e-11</b> | <b>2.22e-36</b> | <b>4.96e-47</b> |
| Global SS Error      | <b>1.86e-28</b> | <b>1.49e-55</b> | <b>2.47e-50</b> |

Table SI.A.1: **Significance of the comparison between *PETIMOT-default* and baseline methods on the test set (824 proteins).** We report the p-value of the one-sided paired Wilcoxon ranked signed test for each pair of methods (X,Y) where X is *PETIMOT-default* and the alternative hypothesis is that performance of X is better than than of Y, for different performance metrics. Significant p-values (<0.05) are highlighted in bold. The average performance values are reported in the main Table 1.

| Metrics              | 5 layers        | 10 layers       | shared 15 layers | reduced dim.    |
|----------------------|-----------------|-----------------|------------------|-----------------|
| Min. LS Error        | <b>8.48e-06</b> | 0.72            | 0.84             | 0.53            |
| Min. Magnitude Error | <b>8.82e-11</b> | 0.15            | 5.04e-02         | 0.70            |
| OLA LS Error         | <b>5.55e-11</b> | 0.63            | 0.28             | 0.67            |
| OLA Magnitude Error  | <b>1.65e-10</b> | 0.12            | <b>2.08e-07</b>  | <b>3.82e-02</b> |
| Global SS Error      | <b>2.11e-36</b> | <b>1.36e-02</b> | <b>2.42e-05</b>  | <b>5.86e-04</b> |

Table SI.A.2: **Significance of the network depth ablations performed on *PETIMOT-default* assessed on the test set (824 proteins).** We report the p-value of the one-sided paired Wilcoxon ranked signed test for each pair of methods (X,Y) where X is *PETIMOT-default* and the alternative hypothesis is that performance of X is better than than of Y, for different performance metrics. The cumulative performance curves are shown in Figure B.1.

| Metrics              | ESMC<br>(600M)  | sequence ablation<br>(w. rand emb.) | structure ablation<br>(ProstT5) | seq. & struct.<br>ablation |                  |
|----------------------|-----------------|-------------------------------------|---------------------------------|----------------------------|------------------|
| Min. LS Error        | <b>2.57e-02</b> | <b>1.12e-09</b>                     | <b>3.47e-25</b>                 | <b>3.88e-80</b>            | <b>2.70e-107</b> |
| Min. Magnitude Error | 0.26            | <b>1.41e-05</b>                     | <b>1.20e-32</b>                 | <b>2.49e-100</b>           | <b>2.00e-107</b> |
| OLA LS Error         | 0.13            | <b>2.09e-08</b>                     | <b>1.25e-32</b>                 | <b>2.18e-95</b>            | <b>2.24e-116</b> |
| OLA Magnitude Error  | 0.11            | <b>1.91e-04</b>                     | <b>4.10e-32</b>                 | <b>1.00e-120</b>           | <b>1.39e-116</b> |
| Global SS Error      | <b>1.77e-03</b> | <b>8.55e-14</b>                     | <b>9.55e-70</b>                 | <b>1.12e-105</b>           | <b>2.75e-122</b> |

Table SI.A.3: **Significance of the structure and sequence information ablations performed on *PETIMOT-default* assessed on the test set (824 proteins).** We report the p-value of the one-sided paired Wilcoxon ranked signed test for each pair of methods (X,Y) where X is *PETIMOT-default* and the alternative hypothesis is that performance of X is better than than of Y, for different performance metrics. The cumulative performance curves are shown in Figure B.2.

| Metrics              | only random     | only close      | fixed random    |
|----------------------|-----------------|-----------------|-----------------|
| Min. LS Error        | <b>5.09e-04</b> | <b>1.84e-04</b> | 0.88            |
| Min. Magnitude Error | <b>3.05e-03</b> | <b>1.23e-03</b> | 0.66            |
| OLA LS Error         | <b>2.26e-04</b> | <b>1.55e-16</b> | 0.91            |
| OLA Magnitude Error  | <b>4.61e-04</b> | <b>6.94e-09</b> | <b>1.69e-02</b> |
| Global SS Error      | <b>1.07e-08</b> | <b>2.42e-45</b> | <b>2.15e-02</b> |

Table SI.A.4: **Significance of the graph connectivity ablations performed on *PETIMOT-default* assessed on the test set (824 proteins).** We report the p-value of the one-sided paired Wilcoxon ranked signed test for each pair of methods (X,Y) where X is *PETIMOT-default* and the alternative hypothesis is that performance of X is better than than of Y, for different performance metrics. Significant p-values ( $<0.05$ ) are highlighted in bold. The cumulative performance curves are shown in Figure B.4.

| Metrics              | AlphaFlow       | ESMFlow         | NMA             |
|----------------------|-----------------|-----------------|-----------------|
| Min. LS Error        | <b>2.98e-13</b> | <b>9.07e-24</b> | <b>3.36e-30</b> |
| Min. Magnitude Error | <b>1.64e-06</b> | <b>2.25e-16</b> | <b>5.68e-24</b> |
| OLA LS Error         | <b>1.49e-15</b> | <b>1.68e-29</b> | <b>8.11e-29</b> |
| OLA Magnitude Error  | <b>3.89e-07</b> | <b>6.23e-29</b> | <b>2.46e-36</b> |
| Global SS Error      | <b>1.82e-16</b> | <b>1.35e-40</b> | <b>1.98e-34</b> |

Table SI.A.5: **Significance of the comparison between *PETIMOT-stringent* and baseline methods on the non-redundant test set (734 proteins).** We report the p-value of the one-sided paired Wilcoxon ranked signed test for each pair of methods (X,Y) where X is *PETIMOT-default* and the alternative hypothesis is that performance of X is better than than of Y, for different performance metrics. Significant p-values ( $<0.05$ ) are highlighted in bold. The cumulative performance curves are shown in Figure C.4a-b.

| Metrics              | <i>PETIMOT-default</i> | AlphaFlow       | ESMFlow         | NMA             |
|----------------------|------------------------|-----------------|-----------------|-----------------|
| Min. LS Error        | 0.62                   | <b>1.26e-08</b> | <b>7.98e-15</b> | <b>2.24e-17</b> |
| Min. Magnitude Error | 1.00                   | <b>1.90e-03</b> | <b>2.71e-08</b> | <b>2.22e-12</b> |
| OLA LS Error         | 0.75                   | <b>9.02e-10</b> | <b>4.00e-16</b> | <b>4.26e-16</b> |
| OLA Magnitude Error  | 0.98                   | <b>1.48e-03</b> | <b>1.00e-16</b> | <b>3.13e-21</b> |
| Global SS Error      | 0.99                   | <b>1.54e-09</b> | <b>4.75e-23</b> | <b>1.69e-18</b> |

Table SI.A.6: **Significance of the comparison between *PETIMOT-stringent* and baseline methods on 474 test proteins that share less than 30% sequence similarity with any protein used in training or validation of either model.** We report the p-value of the one-sided paired Wilcoxon ranked signed test for each pair of methods (X,Y) where X is *PETIMOT-default* and the alternative hypothesis is that performance of X is better than than of Y, for different performance metrics. Significant p-values ( $<0.05$ ) are highlighted in bold. The cumulative performance curves are shown in Figure C.4c-d.

## B Influence of initial random seeding for predicting motions

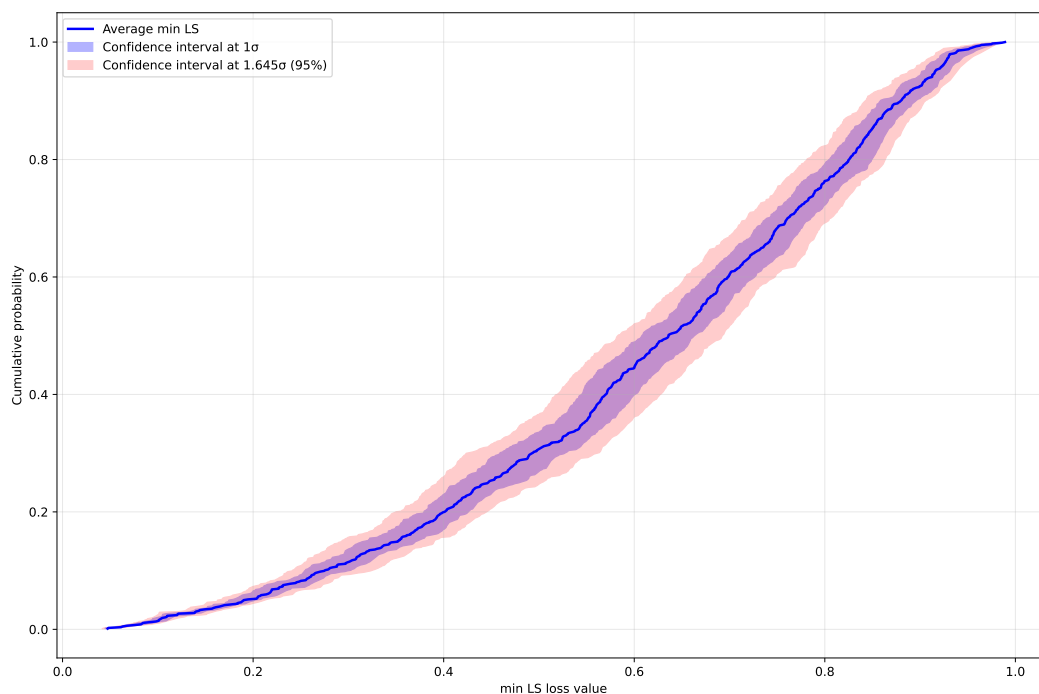

Figure SI.B.1: **Cumulative distribution analysis of PETIMOT robustness across random seeds on the test set (824 proteins).** The blue curve shows the cumulative distribution of minimum LS errors averaged over 100 training runs with different seeds (ranging from 1 to 100). The x-axis represents the loss values, and the y-axis indicates the cumulative probability. The blue and red confidence intervals correspond to  $1\sigma$  and  $1.645\sigma$  (95% quantile), respectively. This cumulative analysis provides a comprehensive view of the error distribution and confirms the robustness of our protein motion inference approach across different random initializations.

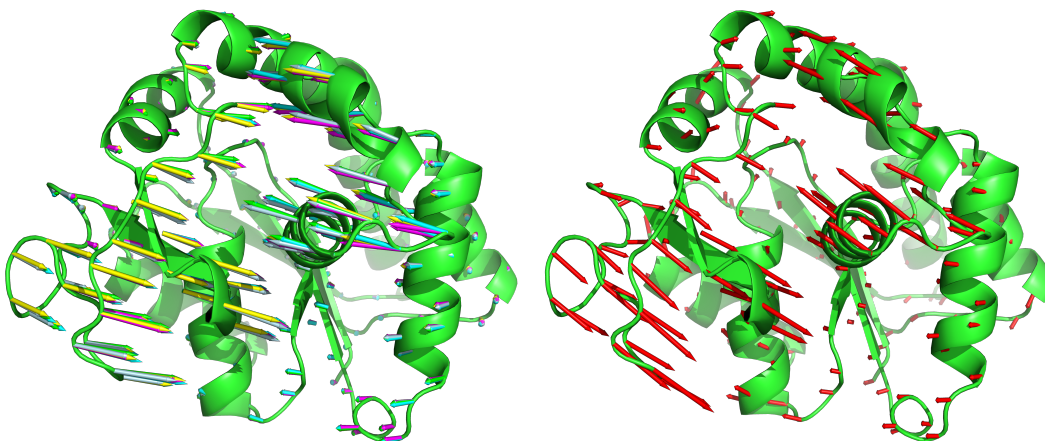

Figure SI.B.2: Correct predictions of motions along the first principal component for chain A of PDB ID 1AKE. The mean min LS loss is 0.29. Predictions for five random seeds are shown in the left (with different colors). Ground-truth motions are shown in the right. One can see consistent predictions over arbitrary seeds.

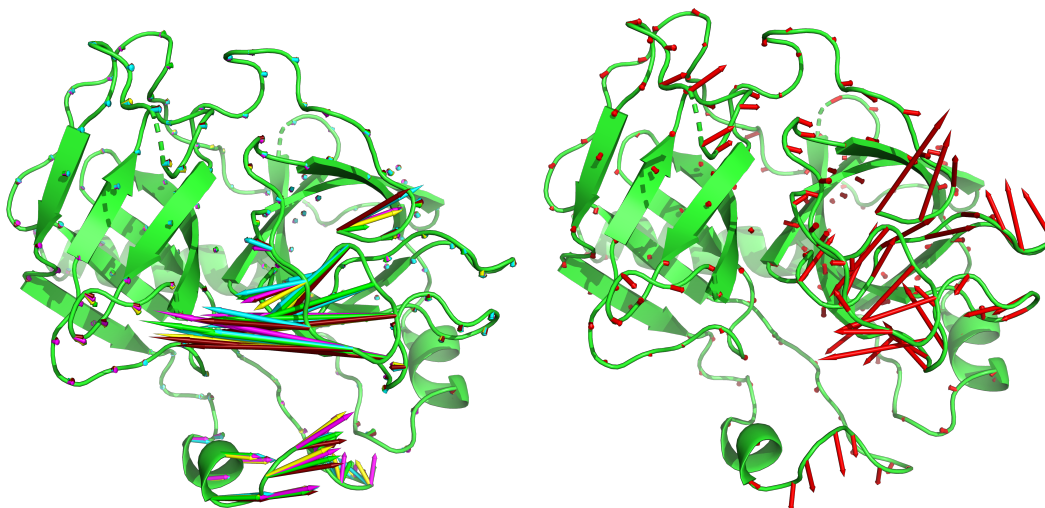

Figure SI.B.3: Incorrect predictions of motions along the first principal component for chain P of PDB ID 2ZCH. The mean min LS loss is 0.83. Predictions for five random seeds are shown in the left (with different colors). Ground-truth motions are shown in the right. One can see consistent, even though incorrect, predictions over arbitrary seeds.
